# Supplementary material for: Exploring eHealth Literacy and Patient-Reported Experiences With Outpatient Care in the Hungarian General Adult Population: Cross-Sectional Study
Source: PubMed Central journal article supplement (PMC7448194; doi:10.2196/19013), 2020-08-11
Supplement: jmir_v22i8e19013_app3.pdf [file jmir_v22i8e19013_app3.pdf]

### Multimedia Appendix 3

#### Logistic regression analysis of unmet medical needs

|                                          | Travel <sup>a</sup> |         | Visit <sup>b</sup> |         | Intervention <sup>c</sup> |         | Medication <sup>d</sup> |         |
|------------------------------------------|---------------------|---------|--------------------|---------|---------------------------|---------|-------------------------|---------|
|                                          | Beta                | P value | Beta               | P value | Beta                      | P value | Beta                    | P value |
| <b>eHEALS<sup>e</sup></b>                |                     |         |                    |         |                           |         |                         |         |
| 2nd quartile                             | -0.19               | .57     | -0.33              | .37     | -0.42                     | .27     | 0.11                    | .74     |
| 3rd quartile                             | -0.62               | .05     | -0.15              | .66     | -0.75                     | .05     | -0.19                   | .56     |
| 4th quartile                             | -0.24               | .46     | -0.17              | .66     | -0.07                     | .85     | -0.31                   | .39     |
| <b>Age group<sup>f</sup></b>             |                     |         |                    |         |                           |         |                         |         |
| 25-44 years old                          | 0.25                | .56     | 0.37               | .45     | 0.89                      | .14     | -0.32                   | .46     |
| 45-64 years old                          | -0.05               | .91     | -0.41              | .46     | -0.13                     | .85     | -0.81                   | .1      |
| 65+ years old                            | -0.30               | .57     | -0.36              | .54     | 0.35                      | .61     | -0.98                   | .06     |
| <b>Education<sup>g</sup></b>             |                     |         |                    |         |                           |         |                         |         |
| Secondary                                | 0.22                | .45     | 0.24               | .46     | -0.16                     | .64     | 0.37                    | .21     |
| Tertiary                                 | -0.84               | .02     | -0.67              | .09     | -0.55                     | .16     | -1.00                   | .009    |
| <b>Gender</b>                            |                     |         |                    |         |                           |         |                         |         |
| Male                                     | -0.36               | .16     | -0.32              | .26     | -0.02                     | .94     | -0.39                   | .14     |
| <b>Income<sup>h</sup></b>                |                     |         |                    |         |                           |         |                         |         |
| 2nd quintile                             | -0.47               | .18     | -0.22              | .57     | 0.31                      | .44     | 0.16                    | .65     |
| 3rd quintile                             | -1.14               | .01     | -1.02              | .06     | -0.46                     | .38     | 0.07                    | .87     |
| 4th quintile                             | -0.43               | .26     | -0.17              | .69     | -0.30                     | .52     | -0.03                   | .95     |
| 5th quintile                             | -0.61               | .08     | -0.59              | .14     | -0.50                     | .23     | -0.65                   | .09     |
| <b>Paid employment</b>                   |                     |         |                    |         |                           |         |                         |         |
| Yes                                      | -0.21               | .46     | 0.03               | .93     | -0.05                     | .88     | 0.05                    | .86     |
| <b>Family status</b>                     |                     |         |                    |         |                           |         |                         |         |
| Married / domestic partnership           | 0.43                | .08     | 0.04               | .89     | 0.35                      | .22     | 0.10                    | .69     |
| <b>Residence<sup>i</sup></b>             |                     |         |                    |         |                           |         |                         |         |
| City                                     | -0.17               | .58     | -0.57              | .08     | 0.51                      | .18     | -0.20                   | .54     |
| Village                                  | -0.02               | .97     | -0.43              | .27     | 0.06                      | .9      | -0.36                   | .35     |
| <b>Self-perceived health<sup>j</sup></b> |                     |         |                    |         |                           |         |                         |         |
| Very bad                                 | 1.50                | .29     | -0.37              | .8      | 1.41                      | .35     | 0.82                    | .56     |
| Bad                                      | 1.55                | .03     | 0.38               | .6      | 1.65                      | .046    | 0.22                    | .75     |
| Fair                                     | 0.68                | .25     | -0.32              | .61     | 1.04                      | .15     | 0.22                    | .7      |
| Good                                     | 0.36                | .51     | -0.08              | .89     | 0.46                      | .5      | -0.55                   | .31     |
| <b>GALI<sup>k</sup></b>                  |                     |         |                    |         |                           |         |                         |         |
| Limited but not severely                 | 0.40                | .15     | 0.66               | .04     | 0.10                      | .75     | 1.03                    | <.001   |
| Severely limited                         | 0.78                | .09     | 1.05               | .04     | 0.43                      | .4      | 1.60                    | <.001   |
| <b>Chronic morbidity</b>                 |                     |         |                    |         |                           |         |                         |         |
| Yes                                      | 0.15                | .63     | 0.75               | .04     | 0.22                      | .57     | 0.16                    | .63     |
| <b>Setting<sup>l</sup></b>               |                     |         |                    |         |                           |         |                         |         |
| Public specialist                        | 0.03                | .95     | 0.99               | .08     | 0.29                      | .63     | 0.17                    | .77     |
| Private specialist                       | 0.82                | .19     | 1.98               | .002    | 0.91                      | .19     | -0.05                   | .94     |
| <b>HCP type<sup>m</sup></b>              |                     |         |                    |         |                           |         |                         |         |
| Specialist                               | -0.36               | .49     | -1.31              | .02     | -0.12                     | .83     | -0.16                   | .77     |
| Other                                    | -                   | -       | -                  | -       | -                         | -       | -                       | -       |
| <b>Usual HCP</b>                         |                     |         |                    |         |                           |         |                         |         |
| Yes                                      | 0.26                | .45     | 0.06               | .87     | 0.04                      | .93     | 0.02                    | .95     |
| <b>Constant</b>                          | -1.23               | .14     | -1.29              | .16     | -3.20                     | .002    | -0.71                   | .39     |
| <b>n</b>                                 | 497                 |         | 498                |         | 501                       |         | 499                     |         |
| LR <sup>n</sup> test Chi-square (28)     | 77.8                | <0.001  | 63.6               | <0.001  | 46.5                      | .02     | 93.5                    | <0.001  |
| GOF <sup>o</sup> test Chi-square (462)   | 492.5               | .16     |                    |         |                           |         |                         |         |
| GOF test Chi-square (457)                |                     |         | 518.2              | .04     |                           |         |                         |         |
| GOF test Chi-square (458)                |                     |         |                    |         | 505.3                     | .10     |                         |         |
| GOF test Chi-square (456)                |                     |         |                    |         |                           |         | 488.1                   | .21     |

<sup>a</sup>Missed visit due to travel burden

<sup>b</sup>Missed visit due to cost burden

<sup>c</sup>Missed intervention due to cost burden

<sup>d</sup>Missed medication due to cost burden

<sup>e</sup>Base: 1st quartile

<sup>f</sup>Base: 18-24 years old

<sup>g</sup>Base: Primary

<sup>h</sup>Base: 1st quintile

<sup>i</sup>Base: Capital

<sup>j</sup>Base: Very good

<sup>k</sup>Base: Not limited

<sup>l</sup>Base: General practitioner

<sup>m</sup>Base: General practitioner

<sup>n</sup>Likelihood ratio; omnibus test for independence, current model versus null model

<sup>o</sup>Goodness of fit; Hosmer-Lemeshow test
