# Supplementary material for: Exploring eHealth Literacy and Patient-Reported Experiences With Outpatient Care in the Hungarian General Adult Population: Cross-Sectional Study
Source: PubMed Central journal article supplement (PMC7448194; doi:10.2196/19013), 2020-08-11
Supplement: jmir_v22i8e19013_app4.pdf [file jmir_v22i8e19013_app4.pdf]

Zrubka Z, Brito Fernandes O, Baji P, Hajdu O, Kovács L, Kringos D; Klazinga N, Gulácsi L, Brodszky V, Rencz F, Péntek M. eHealth Literacy and Patient-Reported Experiences with Outpatient Care in the Hungarian General Adult Population: A Cross-Sectional Survey Study. *J Med Internet Res.* 2020

## Multimedia Appendix 4

### Regression analysis of waiting times

| Model                                    | oWP <sup>a</sup> |         | aWP <sup>b</sup> |         | Log-oWT <sup>c</sup> |         | Log-aWT <sup>d</sup> |         |
|------------------------------------------|------------------|---------|------------------|---------|----------------------|---------|----------------------|---------|
|                                          | Beta             | P value | Beta             | P value | Beta                 | P value | Beta                 | P value |
| <b>eHEALS<sup>e</sup></b>                |                  |         |                  |         |                      |         |                      |         |
| 2nd quartile                             | 0.24             | .45     | -0.48            | .22     | 0.09                 | .54     | 0.03                 | .89     |
| 3rd quartile                             | 0.34             | .27     | -0.34            | .35     | 0.04                 | .78     | -0.03                | .87     |
| 4th quartile                             | 0.46             | .15     | -0.32            | .41     | 0.13                 | .38     | 0.02                 | .91     |
| <b>Age group<sup>f</sup></b>             |                  |         |                  |         |                      |         |                      |         |
| 25-34 years old                          | 0.03             | .95     | -0.35            | .52     | 0.14                 | .49     | -0.09                | .76     |
| 45-64 years old                          | -0.78            | .11     | -0.46            | .45     | -0.06                | .78     | 0.12                 | .70     |
| 65+ years old                            | -0.72            | .17     | -0.77            | .24     | 0.08                 | .74     | 0.32                 | .34     |
| <b>Education<sup>g</sup></b>             |                  |         |                  |         |                      |         |                      |         |
| Secondary                                | -0.17            | .55     | -0.33            | .36     | -0.07                | .58     | -0.22                | .23     |
| Tertiary                                 | -0.17            | .60     | -0.20            | .61     | -0.18                | .19     | -0.10                | .63     |
| <b>Gender</b>                            |                  |         |                  |         |                      |         |                      |         |
| Male                                     | -0.07            | .78     | -0.89            | .004    | 0.05                 | .64     | -0.07                | .63     |
| <b>Income<sup>h</sup></b>                |                  |         |                  |         |                      |         |                      |         |
| 2nd quintile                             | -0.36            | .30     | 0.46             | .29     | 0.04                 | .78     | -0.18                | .43     |
| 3rd quintile                             | -0.95            | .03     | 0.55             | .26     | -0.30                | .11     | 0.12                 | .68     |
| 4th quintile                             | -0.43            | .27     | -0.25            | .65     | 0.06                 | .71     | -0.15                | .54     |
| 5th quintile                             | -0.26            | .45     | 0.30             | .49     | -0.16                | .30     | -0.32                | .16     |
| <b>Paid employment</b>                   |                  |         |                  |         |                      |         |                      |         |
| Yes                                      | -0.18            | .54     | -0.18            | .62     | -0.09                | .46     | 0.10                 | .58     |
| <b>Family status</b>                     |                  |         |                  |         |                      |         |                      |         |
| Married / domestic partnership           | -0.47            | .06     | -0.12            | .68     | -0.03                | .76     | -0.19                | .22     |
| <b>Residence<sup>i</sup></b>             |                  |         |                  |         |                      |         |                      |         |
| City                                     | 0.34             | .26     | 0.43             | .27     | 0.20                 | .12     | -0.15                | .43     |
| Village                                  | 0.03             | .94     | 0.19             | .68     | 0.03                 | .85     | -0.41                | .07     |
| <b>Self-perceived health<sup>j</sup></b> |                  |         |                  |         |                      |         |                      |         |
| Very bad                                 | 2.55             | .08     | -                | -       | -0.01                | .99     | -1.18                | .24     |
| Bad                                      | 1.34             | .04     | 0.21             | .78     | 0.45                 | .11     | 0.35                 | .39     |
| Fair                                     | 0.71             | .18     | 0.34             | .61     | 0.23                 | .29     | 0.31                 | .33     |
| Good                                     | 0.61             | .22     | -0.18            | .77     | 0.27                 | .18     | 0.13                 | .65     |
| <b>GALI<sup>k</sup></b>                  |                  |         |                  |         |                      |         |                      |         |
| Limited but not severely                 | 0.66             | .01     | 0.64             | .05     | 0.33                 | .005    | -0.06                | .74     |
| Severely limited                         | 0.49             | .30     | 1.19             | .02     | 0.33                 | .13     | 0.08                 | .82     |
| <b>Chronic morbidity</b>                 |                  |         |                  |         |                      |         |                      |         |
| Yes                                      | -                | .99     | 0.15             | .70     | 0.03                 | .80     | 0.11                 | .58     |
| <b>Setting<sup>l</sup></b>               |                  |         |                  |         |                      |         |                      |         |
| Public specialist                        | -0.37            | .55     | 0.92             | .18     | 0.52                 | .04     | 1.38                 | <.001   |
| Private specialist                       | -0.70            | .32     | 1.15             | .13     | -0.30                | .31     | 1.02                 | .02     |
| <b>HCP type<sup>m</sup></b>              |                  |         |                  |         |                      |         |                      |         |
| Specialist                               | 0.13             | .83     | 0.37             | .57     | -0.37                | .14     | 0.71                 | .05     |
| Other                                    | -                | -       | -                | -       | -                    | -       | -                    | -       |
| <b>Usual HCP</b>                         |                  |         |                  |         |                      |         |                      |         |
| Yes                                      | 0.56             | .11     | 0.80             | .06     | -                    | .97     | -0.21                | .31     |
| <b>Constant</b>                          |                  |         |                  |         |                      |         |                      |         |
|                                          | -1.81            | .03     | -3.04            | .003    | 3.07                 | <.001   | 0.45                 | .38     |
| n                                        | 505              |         | 502              |         | 502                  |         | 492                  |         |
| LR <sup>o</sup> test Chi-square (28)     | 52.2             | .004    | 63.8             | <.001   |                      |         |                      |         |
| LR test F(28;473)                        |                  |         |                  |         | 2.49                 | <.001   |                      |         |
| LR test F(28;463)                        |                  |         |                  |         |                      |         | 8.92                 | <.001   |
| R <sup>2</sup>                           |                  |         |                  |         | 0.13                 |         | 0.31                 |         |
| GOF <sup>p</sup> test Chi-square (470)   | 488.1            | .27     |                  |         |                      |         |                      |         |
| GOF <sup>p</sup> test Chi-square (468)   |                  |         | 515.0            | .07     |                      |         |                      |         |
| Breusch-Pagan test Chi-square (1)        |                  |         |                  |         | 0.9                  | .33     | 1.9                  | .16     |
| Ramsey RESET test F(3;470)               |                  |         |                  |         | 0.8                  | .49     |                      |         |
| Ramsey RESET test F(3;460)               |                  |         |                  |         |                      |         | 4.3                  | .005    |

<sup>a</sup>Office waiting time was a problem

<sup>b</sup>Appointment waiting time was a problem

<sup>c</sup>Log-office waiting time

<sup>d</sup>Log- appointment waiting time

<sup>e</sup>Base: 1st quartile

<sup>f</sup>Base: 18-24 years old

<sup>g</sup>Base: Primary

<sup>h</sup>Base: 1st quintile

<sup>i</sup>Base: Capital

<sup>j</sup>Base: Very good

<sup>k</sup>Base: Not limited

<sup>l</sup>Base: General practitioner

<sup>m</sup>Base: General practitioner

<sup>n</sup>OLS: Ordinary least squares regression

<sup>o</sup>Likelihood ratio; omnibus test for independence, current model versus null model

<sup>p</sup>Goodness of fit; Hosmer-Lemeshow test
