# Supplementary material for: Exploring eHealth Literacy and Patient-Reported Experiences With Outpatient Care in the Hungarian General Adult Population: Cross-Sectional Study
Source: PubMed Central journal article supplement (PMC7448194; doi:10.2196/19013), 2020-08-11
Supplement: jmir_v22i8e19013_app5.pdf [file jmir_v22i8e19013_app5.pdf]

Zrubka Z, Brito Fernandes O, Baji P, Hajdu O, Kovács L, Kringos D; Klazinga N, Gulácsi L, Brodszky V, Rencz F, Péntek M. eHealth Literacy and Patient-Reported Experiences with Outpatient Care in the Hungarian General Adult Population: A Cross-Sectional Survey Study. *J Med Internet Res.* 2020

## Multimedia Appendix 5

### Regression analyses of unmet medical needs and waiting times PREM scores

| Model                                    | Square root Unmet Medical Needs Score |         | Any Unmet Medical Needs |         | Any Waiting Problem |         |
|------------------------------------------|---------------------------------------|---------|-------------------------|---------|---------------------|---------|
|                                          | Robust <sup>p</sup>                   |         | Logistic                |         | Logistic            |         |
|                                          | Beta                                  | P value | Beta                    | P value | Beta                | P value |
| <b>eHEALS<sup>e</sup></b>                |                                       |         |                         |         |                     |         |
| 2nd quartile                             | -0.05                                 | .58     | -0.08                   | .79     | -0.02               | .94     |
| 3rd quartile                             | -0.15                                 | .06     | -0.57                   | .05     | 0.23                | .42     |
| 4th quartile                             | -0.08                                 | .38     | -0.41                   | .19     | 0.07                | .81     |
| <b>Age group<sup>f</sup></b>             |                                       |         |                         |         |                     |         |
| 25-44 years old                          | -0.09                                 | .41     | -0.84                   | .05     | -0.31               | .45     |
| 45-64 years old                          | -0.29                                 | .02     | -1.45                   | .002    | -0.96               | .03     |
| 65+ years old                            | -0.26                                 | .06     | -1.27                   | .01     | -1.34               | .007    |
| <b>Education<sup>g</sup></b>             |                                       |         |                         |         |                     |         |
| Secondary                                | 0.05                                  | .52     | 0.12                    | .66     | -0.31               | .25     |
| Tertiary                                 | -0.24                                 | .006    | -0.87                   | .005    | -0.22               | .46     |
| <b>Gender</b>                            |                                       |         |                         |         |                     |         |
| Male                                     | -0.11                                 | .1      | -0.31                   | .19     | -0.52               | .02     |
| <b>Income<sup>h</sup></b>                |                                       |         |                         |         |                     |         |
| 2nd quintile                             | -0.03                                 | .78     | -0.16                   | .64     | -0.08               | .82     |
| 3rd quintile                             | -0.23                                 | .04     | -0.72                   | .08     | -0.45               | .26     |
| 4th quintile                             | -0.10                                 | .39     | -0.29                   | .42     | -0.24               | .52     |
| 5th quintile                             | -0.24                                 | .02     | -0.83                   | .01     | -0.05               | .89     |
| <b>Paid employment</b>                   |                                       |         |                         |         |                     |         |
| Yes                                      | -0.05                                 | .51     | -0.34                   | .23     | -0.21               | .44     |
| <b>Family status</b>                     |                                       |         |                         |         |                     |         |
| Married / domestic partnership           | 0.07                                  | .28     | 0.26                    | .26     | -0.45               | .05     |
| <b>Residence<sup>i</sup></b>             |                                       |         |                         |         |                     |         |
| City                                     | -0.08                                 | .27     | -0.37                   | .19     | 0.49                | .09     |
| Village                                  | -0.03                                 | .78     | 0.05                    | .89     | 0.31                | .37     |
| <b>Self-perceived health<sup>j</sup></b> |                                       |         |                         |         |                     |         |
| Very bad                                 | 0.64                                  | .009    | -                       | -       | 1.77                | .21     |
| Bad                                      | 0.45                                  | .01     | 1.82                    | .006    | 1.15                | .06     |
| Fair                                     | 0.21                                  | .13     | 1.15                    | .04     | 0.76                | .13     |
| Good                                     | 0.11                                  | .39     | 0.81                    | .11     | 0.40                | .39     |
| <b>GALI<sup>k</sup></b>                  |                                       |         |                         |         |                     |         |
| Limited but not severely                 | 0.17                                  | .02     | 0.50                    | .04     | 0.72                | .003    |
| Severely limited                         | 0.33                                  | .04     | 0.91                    | .049    | 0.58                | .19     |
| <b>Chronic morbidity</b>                 |                                       |         |                         |         |                     |         |
| Yes                                      | 0.16                                  | .04     | 0.45                    | .12     | 0.33                | .25     |
| <b>Setting<sup>l</sup></b>               |                                       |         |                         |         |                     |         |
| Public specialist                        | 0.22                                  | .22     | 0.74                    | .21     | -0.07               | .9      |
| Private specialist                       | 0.43                                  | .03     | 1.21                    | .08     | -0.34               | .59     |
| <b>HCP type<sup>m</sup></b>              |                                       |         |                         |         |                     |         |
| Specialist                               | -0.27                                 | .12     | -0.74                   | .21     | 0.29                | .6      |
| Other                                    | -                                     | -       | -                       | -       | -                   | -       |
| <b>Usual HCP</b>                         |                                       |         |                         |         |                     |         |
| Yes                                      | 0.05                                  | .54     | 0.37                    | .23     | 0.72                | .02     |
| <b>Constant</b>                          | 0.66                                  | .002    | -0.03                   | .97     | -1.56               | .04     |
| <b>n</b>                                 | 484                                   |         | 481                     |         | 505                 |         |
| LR <sup>n</sup> test F(28;455)           | 7.15                                  | <.001   |                         |         |                     |         |
| LR test Chi-square (27)                  |                                       |         | 114.1                   | <.001   |                     |         |
| LR test Chi-square (28)                  |                                       |         |                         |         | 74.8                | <.001   |
| R <sup>2</sup>                           | 0.23                                  |         |                         |         |                     |         |
| Ramsey RESET test F(3;452)               | 1.77                                  | .15     |                         |         |                     |         |
| GOF <sup>o</sup> test Chi-square (447)   |                                       |         | 488.9                   | .08     |                     |         |
| GOF test Chi-square (462)                |                                       |         |                         |         | 482.8               | .33     |

<sup>a</sup>Office waiting time was a problem

<sup>b</sup>Appointment waiting time was a problem

<sup>c</sup>Log-office waiting time

<sup>d</sup>Log- appointment waiting time

<sup>e</sup>Base: 1st quartile

<sup>f</sup>Base: 18-24 years old

<sup>g</sup>Base: Primary

<sup>h</sup>Base: 1st quintile

<sup>i</sup>Base: Capital

<sup>j</sup>Base: Very goodr

<sup>k</sup>Base: Not limited

<sup>l</sup>Base: General practitioner

<sup>m</sup>Base: General practitioner

<sup>n</sup>Likelihood ratio; omnibus test for independence, current model versus null model

<sup>o</sup>Goodness of fit, Hosmer-Lemeshow test

<sup>p</sup>Ordinary least squares regression with robust standard errors
