# Supplementary material for: Exploring eHealth Literacy and Patient-Reported Experiences With Outpatient Care in the Hungarian General Adult Population: Cross-Sectional Study
Source: PubMed Central journal article supplement (PMC7448194; doi:10.2196/19013), 2020-08-11
Supplement: jmir_v22i8e19013_app6.pdf [file jmir_v22i8e19013_app6.pdf]

Zrubka Z, Brito Fernandes O, Baji P, Hajdu O, Kovács L, Kringos D; Klazinga N, Gulácsi L, Brodszky V, Rencz F, Péntek M. eHealth Literacy and Patient-Reported Experiences with Outpatient Care in the Hungarian General Adult Population: A Cross-Sectional Survey Study. J Med Internet Res. 2020

**Multimedia Appendix 6. Sensitivity analysis of PREM<sup>a</sup> regression models by varying eHEALS<sup>b</sup> group category boundaries**

| <b>Scenario</b>                 | <b>eHEALS Group 1</b> | <b>eHEALS Group 2</b> | <b>eHEALS Group 3</b> | <b>eHEALS Group 4</b> |
|---------------------------------|-----------------------|-----------------------|-----------------------|-----------------------|
| #1 eHEALS score range<br>N (%)  | 0-25<br>148 (22.2)    | 26-28<br>126 (18.9)   | 29-32<br>250 (37.5)   | 33-40<br>142 (21.3)   |
| #2 eHEALS score range<br>N (%)  | 0-25<br>148 (22.2)    | 26-28<br>126 (18.9)   | 29-34<br>299 (44.9)   | 35-40<br>93 (14.0)    |
| #3 eHEALS score range<br>N (%)  | 0-25<br>148 (22.2)    | 26-29<br>194 (29.1)   | 30-32<br>182 (27.3)   | 33-40<br>142 (21.3)   |
| #4 eHEALS score range<br>N (%)  | 0-25<br>148 (22.2)    | 26-29<br>194 (29.1)   | 30-34<br>231 (34.7)   | 35-40<br>93 (14.0)    |
| #5 eHEALS score range<br>N (%)  | 0-25<br>148 (22.2)    | 26-30<br>235 (35.3)   | 31-32<br>141 (21.2)   | 33-40<br>142 (21.3)   |
| #6 eHEALS score range<br>N (%)  | 0-25<br>148 (22.2)    | 26-30<br>235 (35.3)   | 31-34<br>190 (28.5)   | 35-40<br>93 (14.0)    |
| #7 eHEALS score range<br>N (%)  | 0-26<br>191 (28.7)    | 27-28<br>83 (12.5)    | 29-32<br>250 (37.5)   | 33-40<br>142 (21.3)   |
| #8 eHEALS score range<br>N (%)  | 0-26<br>191 (28.7)    | 27-28<br>83 (12.5)    | 29-34<br>299 (44.9)   | 35-40<br>93 (14.0)    |
| #9 eHEALS score range<br>N (%)  | 0-26<br>191 (28.7)    | 27-29<br>151 (22.7)   | 30-32<br>182 (27.3)   | 33-40<br>142 (21.3)   |
| #10 eHEALS score range<br>N (%) | 0-26<br>191 (28.7)    | 27-29<br>151 (22.7)   | 30-34<br>231 (34.7)   | 35-40<br>93 (14.0)    |
| #11 eHEALS score range<br>N (%) | 0-26<br>191 (28.7)    | 27-30<br>192(28.8)    | 31-32<br>141 (21.2)   | 33-40<br>142 (21.3)   |
| #12 eHEALS score range<br>N (%) | 0-26<br>191 (28.7)    | 27-30<br>192(28.8)    | 31-34<br>190 (28.5)   | 35-40<br>93 (14.0)    |

<sup>a</sup>PREM: OECD-proposed Set of Questions on Patients' Experiences with Ambulatory Care; <sup>b</sup>eHealth Literacy Scale

| <b>Time<sup>a</sup></b>   | <b>Scenario</b>                  | <b>#1</b> | <b>#2</b> | <b>#3</b> | <b>#4</b> | <b>#5</b> | <b>#6</b> | <b>#7</b> | <b>#8</b> | <b>#9</b> | <b>#10</b> | <b>#11</b> | <b>#12</b> |
|---------------------------|----------------------------------|-----------|-----------|-----------|-----------|-----------|-----------|-----------|-----------|-----------|------------|------------|------------|
| Sample                    | N                                | 502       | 502       | 502       | 502       | 502       | 502       | 502       | 502       | 502       | 502        | 502        | 502        |
| LR test <sup>b</sup>      | Chi <sup>2</sup> <sub>(28)</sub> | 51.2      | 52.4      | 51.6      | 52.9      | 51.0      | 52.2      | 53.3      | 54.4      | 52.7      | 54.1       | 53.0       | 54.1       |
|                           | <i>P</i>                         | .005      | .003      | .004      | .003      | .005      | .004      | .003      | .002      | .003      | .002       | .003       | .002       |
| eHEALS Group 2<br>vs base | beta                             | 0.01      | 0.02      | 0.03      | 0.03      | -0.06     | -0.05     | -0.51     | -0.5      | -0.3      | -0.3       | -0.37      | -0.37      |
|                           | <i>P</i>                         | .97       | .95       | .92       | .91       | .82       | .84       | .16       | .16       | .28       | .28        | .16        | .16        |
| eHEALS Group 3<br>vs base | beta                             | -0.1      | -0.14     | -0.16     | -0.2      | -0.08     | -0.15     | -0.25     | -0.29     | -0.31     | -0.35      | -0.22      | -0.29      |
|                           | <i>P</i>                         | .70       | .58       | .57       | .46       | .80       | .60       | .30       | .21       | .24       | .16        | .44        | .26        |
| eHEALS Group 4<br>vs base | beta                             | 0.00      | 0.2       | 0.00      | 0.2       | 0.00      | 0.2       | -0.14     | 0.05      | -0.14     | 0.05       | -0.14      | 0.05       |
|                           | <i>P</i>                         | .99       | .55       | .99       | .56       | .99       | .56       | .60       | .88       | .61       | .88        | .61        | .88        |

Ordered logit model, the constant and coefficients of the following variables were not displayed: Age group, Education, Gender, Income, Paid employment, Family status, Residence, Self-perceived health, Activity limitations, Chronic morbidity, Setting, HCP type, Regular HCP

<sup>a</sup>Doctor spending enough time with patient in consultation (4-point Likert scale)

<sup>b</sup>Likelihood ratio; omnibus test for independence, current model versus null model

<sup>c</sup> base: eHEALS Group 1

| <b>Understand<sup>a</sup></b>          | <b>Scenario</b>                  | <b>#1</b> | <b>#2</b> | <b>#3</b> | <b>#4</b> | <b>#5</b> | <b>#6</b> | <b>#7</b> | <b>#8</b> | <b>#9</b> | <b>#10</b> | <b>#11</b> | <b>#12</b> |
|----------------------------------------|----------------------------------|-----------|-----------|-----------|-----------|-----------|-----------|-----------|-----------|-----------|------------|------------|------------|
| Sample                                 | N                                | 504       | 504       | 504       | 504       | 504       | 504       | 504       | 504       | 504       | 504        | 504        | 504        |
| LR test <sup>b</sup>                   | Chi <sup>2</sup> <sub>(28)</sub> | 55.0      | 56.2      | 59.8      | 61.0      | 59.7      | 60.9      | 56.3      | 57.5      | 60.6      | 61.9       | 61.0       | 62.2       |
|                                        | <i>P</i>                         | .002      | .001      | <.001     | <.001     | <.001     | <.001     | .001      | <.001     | <.001     | <.001      | <.001      | <.001      |
| eHEALS Group 2<br>vs base <sup>c</sup> | beta                             | -0.16     | -0.15     | -0.13     | -0.12     | -0.21     | -0.2      | -0.43     | -0.42     | -0.29     | -0.28      | -0.36      | -0.36      |
|                                        | <i>P</i>                         | .62       | .64       | .66       | .66       | .44       | .45       | .22       | .23       | .31       | .32        | .17        | .17        |
| eHEALS Group 3<br>vs base              | beta                             | -0.66     | -0.68     | -0.93     | -0.9      | -1.06     | -0.99     | -0.72     | -0.74     | -0.98     | -0.95      | -1.11      | -1.04      |
|                                        | <i>P</i>                         | .02       | .01       | .003      | .002      | .002      | .001      | .005      | .003      | <.001     | <.001      | <.001      | <.001      |
| eHEALS Group 4<br>vs base              | beta                             | -0.44     | -0.25     | -0.45     | -0.27     | -0.46     | -0.26     | -0.5      | -0.31     | -0.51     | -0.32      | -0.51      | -0.32      |
|                                        | <i>P</i>                         | .16       | .48       | .15       | .45       | .15       | .45       | .09       | .36       | .09       | .34        | .09        | .34        |

Ordered logit model, the constant and coefficients of the following variables were not displayed: Age group, Education, Gender, Income, Paid employment, Family status, Residence, Self-perceived health, Activity limitations, Chronic morbidity, Setting, HCP type, Regular HCP

<sup>a</sup> Doctor providing easy to understand explanations (4-point Likert scale)

<sup>b</sup> Likelihood ratio; omnibus test for independence, current model versus null model

<sup>c</sup> base: eHEALS Group 1

| Questions <sup>a</sup>                 | Scenario                         | #1    | #2    | #3    | #4    | #5    | #6    | #7    | #8    | #9    | #10   | #11   | #12   |
|----------------------------------------|----------------------------------|-------|-------|-------|-------|-------|-------|-------|-------|-------|-------|-------|-------|
| Sample                                 | N                                | 500   | 500   | 500   | 500   | 500   | 500   | 500   | 500   | 500   | 500   | 500   | 500   |
| LR test <sup>b</sup>                   | Chi <sup>2</sup> <sub>(28)</sub> | 42.1  | 42.6  | 41.5  | 42.0  | 41.4  | 41.8  | 43.6  | 44.1  | 43.7  | 44.2  | 43.9  | 44.3  |
|                                        | <i>P</i>                         | .04   | .04   | .049  | .04   | .049  | .04   | .03   | .03   | .03   | .03   | .03   | .03   |
| eHEALS Group 2<br>vs base <sup>c</sup> | beta                             | 0.00  | 0.00  | -0.11 | -0.1  | -0.14 | -0.14 | -0.42 | -0.41 | -0.42 | -0.42 | -0.42 | -0.42 |
|                                        | <i>P</i>                         | .99   | .99   | .79   | .71   | .59   | .69   | .21   | .22   | .12   | .13   | .19   | .19   |
| eHEALS Group 3<br>vs base              | beta                             | -0.38 | -0.37 | -0.41 | -0.4  | -0.46 | -0.42 | -0.51 | -0.5  | -0.54 | -0.52 | -0.58 | -0.54 |
|                                        | <i>P</i>                         | .15   | .14   | .14   | .14   | .14   | .13   | .04   | .03   | .04   | .03   | .04   | .04   |
| eHEALS Group 4<br>vs base              | beta                             | -0.13 | -0.03 | -0.14 | -0.03 | -0.14 | -0.04 | -0.26 | -0.16 | -0.26 | -0.16 | -0.26 | -0.16 |
|                                        | <i>P</i>                         | .65   | .93   | .64   | .92   | .64   | .91   | .34   | .61   | .34   | .61   | .34   | .61   |

Ordered logit model, the constant and coefficients of the following variables were not displayed: Age group, Education, Gender, Income, Paid employment, Family status, Residence, Self-perceived health, Activity limitations, Chronic morbidity, Setting, HCP type, Regular HCP

<sup>a</sup> Doctor giving opportunity to ask questions or raise concerns (4-point Likert scale)

<sup>b</sup> Likelihood ratio; omnibus test for independence, current model versus null model

<sup>c</sup> base: eHEALS Group 1

| Decisions <sup>a</sup>                 | Scenario                         | #1    | #2    | #3    | #4    | #5    | #6    | #7    | #8    | #9   | #10   | #11   | #12   |
|----------------------------------------|----------------------------------|-------|-------|-------|-------|-------|-------|-------|-------|------|-------|-------|-------|
| Sample                                 | N                                | 477   | 477   | 477   | 477   | 477   | 477   | 477   | 477   | 477  | 477   | 477   | 477   |
| LR test <sup>b</sup>                   | Chi <sup>2</sup> <sub>(28)</sub> | 50.9  | 48.9  | 50.8  | 48.9  | 50.6  | 49.1  | 50.8  | 48.8  | 50.7 | 48.8  | 50.6  | 49.0  |
|                                        | <i>P</i>                         | .005  | .008  | .005  | .009  | .006  | .008  | .005  | .009  | .005 | .009  | .006  | .008  |
| eHEALS Group 2<br>vs base <sup>c</sup> | beta                             | -0.18 | -0.18 | -0.21 | -0.21 | -0.27 | -0.27 | -0.16 | -0.16 | -0.2 | -0.2  | -0.26 | -0.26 |
|                                        | <i>P</i>                         | .56   | .55   | .43   | .43   | .31   | .31   | .63   | .64   | .47  | .48   | .31   | .32   |
| eHEALS Group 3<br>vs base              | beta                             | -0.32 | -0.23 | -0.34 | -0.22 | -0.3  | -0.17 | -0.29 | -0.2  | -0.3 | -0.18 | -0.26 | -0.13 |
|                                        | <i>P</i>                         | .21   | .34   | .21   | .39   | .30   | .53   | .22   | .39   | .23  | .43   | .33   | .60   |
| eHEALS Group 4<br>vs base              | beta                             | 0.11  | 0.06  | 0.11  | 0.06  | 0.11  | 0.06  | 0.15  | 0.1   | 0.15 | 0.1   | 0.15  | 0.1   |
|                                        | <i>P</i>                         | .69   | .86   | .70   | .87   | .70   | .86   | .57   | .75   | .57  | .75   | .57   | .75   |

Ordered logit model, the constant and coefficients of the following variables were not displayed: Age group, Education, Gender, Income, Paid employment, Family status, Residence, Self-perceived health, Activity limitations, Chronic morbidity, Setting, HCP type, Regular HCP

<sup>a</sup>Doctor involving patient in decisions about care and treatment (4-point Likert scale)

<sup>b</sup>Likelihood ratio; omnibus test for independence, current model versus null model

<sup>c</sup>base: eHEALS Group 1

| Overall quality <sup>a</sup>           | Scenario                         | #1    | #2    | #3    | #4    | #5    | #6    | #7   | #8   | #9   | #10  | #11  | #12  |
|----------------------------------------|----------------------------------|-------|-------|-------|-------|-------|-------|------|------|------|------|------|------|
| Sample                                 | N                                | 503   | 503   | 503   | 503   | 503   | 503   | 503  | 503  | 503  | 503  | 503  | 503  |
| LR test <sup>b</sup>                   | Chi <sup>2</sup> <sub>(28)</sub> | 39.9  | 39.9  | 41.2  | 40.9  | 41.6  | 41.1  | 40.8 | 40.7 | 42.1 | 41.9 | 42.9 | 42.4 |
|                                        | <i>P</i>                         | .07   | .07   | .05   | .05   | .047  | .05   | .06  | .06  | .04  | .04  | .04  | .04  |
| eHEALS Group 2<br>vs base <sup>c</sup> | beta                             | -0.11 | -0.11 | -0.06 | -0.06 | -0.03 | -0.03 | 0.29 | 0.29 | 0.24 | 0.24 | 0.25 | 0.25 |
|                                        | <i>P</i>                         | .67   | .67   | .79   | .80   | .90   | .90   | .31  | .31  | .31  | .31  | .26  | .26  |
| eHEALS Group 3<br>vs base              | beta                             | 0.3   | 0.29  | 0.41  | 0.37  | 0.48  | 0.42  | 0.44 | 0.43 | 0.55 | 0.51 | 0.62 | 0.56 |
|                                        | <i>P</i>                         | .18   | .19   | .09   | .11   | .06   | .08   | .03  | .03  | .02  | .02  | .01  | .01  |
| eHEALS Group 4<br>vs base              | beta                             | 0.19  | 0.18  | 0.2   | 0.19  | 0.2   | 0.19  | 0.34 | 0.33 | 0.34 | 0.33 | 0.34 | 0.33 |
|                                        | <i>P</i>                         | .45   | .52   | .44   | .51   | .44   | .51   | .16  | .23  | .16  | .22  | .15  | .22  |

Ordered logit model, the constant and coefficients of the following variables were not displayed: Age group, Education, Gender, Income, Paid employment, Family status, Residence, Self-perceived health, Activity limitations, Chronic morbidity, Setting, HCP type, Regular HCP

<sup>a</sup>Overall, how would you rate the quality of this consultation? (5-point Likert-scale)

<sup>b</sup>Likelihood ratio; omnibus test for independence, current model versus null model

<sup>c</sup>base: eHEALS Group 1

| Log-problem score <sup>a</sup>      | Scenario              | #1    | #2    | #3    | #4    | #5    | #6    | #7    | #8    | #9    | #10   | #11   | #12   |
|-------------------------------------|-----------------------|-------|-------|-------|-------|-------|-------|-------|-------|-------|-------|-------|-------|
| Sample                              | N                     | 473   | 473   | 473   | 473   | 473   | 473   | 473   | 473   | 473   | 473   | 473   | 473   |
| LR test <sup>b</sup>                | F <sub>(28,444)</sub> | 2.67  | 2.71  | 2.61  | 2.65  | 2.55  | 2.59  | 2.65  | 2.69  | 2.63  | 2.66  | 2.60  | 2.63  |
|                                     | <i>P</i>              | <.001 | <.001 | <.001 | <.001 | <.001 | <.001 | <.001 | <.001 | <.001 | <.001 | <.001 | <.001 |
| eHEALS Group 2 vs base <sup>c</sup> | beta                  | 0.01  | 0.01  | -0.02 | -0.01 | -0.04 | -0.04 | -0.05 | -0.05 | -0.06 | -0.06 | -0.08 | -0.08 |
|                                     | <i>P</i>              | .90   | .90   | .76   | .76   | .45   | .45   | .36   | .36   | .23   | .23   | .09   | .09   |
| eHEALS Group 3 vs base              | beta                  | -0.07 | -0.07 | -0.08 | -0.07 | -0.07 | -0.06 | -0.09 | -0.08 | -0.1  | -0.09 | -0.09 | -0.08 |
|                                     | <i>P</i>              | .11   | .13   | .08   | .11   | .15   | .19   | .03   | .04   | .02   | .03   | .05   | .07   |
| eHEALS Group 4 vs base              | beta                  | 0     | 0.02  | 0     | 0.02  | 0     | 0.02  | -0.02 | 0     | -0.02 | 0     | -0.02 | 0     |
|                                     | <i>P</i>              | .96   | .71   | .97   | .72   | .97   | .72   | .74   | .96   | .73   | .96   | .74   | .95   |

Ordinary least squares regression (OLS) with robust standard errors, the constant and coefficients of the following variables were not displayed: Age group, Education, Gender, Income, Paid employment, Family status, Residence, Self-perceived health, Activity limitations, Chronic morbidity, Setting, HCP type, Regular HCP

<sup>a</sup> Problem Score: the sum of answers for each PREM item (1: yes, definitely – 4: definitely not), higher values represent more problems experienced during the visit.

<sup>b</sup> Likelihood ratio; omnibus test for independence, current model versus null model

<sup>c</sup> base: eHEALS Group 1

| Negative experiences score <sup>a</sup> | Scenario              | #1    | #2    | #3    | #4    | #5    | #6    | #7    | #8    | #9    | #10   | #11   | #12   |
|-----------------------------------------|-----------------------|-------|-------|-------|-------|-------|-------|-------|-------|-------|-------|-------|-------|
| Sample                                  | N                     | 473   | 473   | 473   | 473   | 473   | 473   | 473   | 473   | 473   | 473   | 473   | 473   |
| LR test <sup>b</sup>                    | F <sub>(28,444)</sub> | 2.80  | 2.85  | 2.75  | 2.79  | 2.71  | 2.76  | 2.81  | 2.86  | 2.81  | 2.85  | 2.80  | 2.84  |
|                                         | <i>P</i>              | <.001 | <.001 | <.001 | <.001 | <.001 | <.001 | <.001 | <.001 | <.001 | <.001 | <.001 | <.001 |
| eHEALS Group 2<br>vs base <sup>c</sup>  | beta                  | -0.05 | -0.05 | -0.16 | -0.16 | -0.21 | -0.21 | -0.32 | -0.32 | -0.37 | -0.36 | -0.4  | -0.4  |
|                                         | <i>P</i>              | .82   | .82   | .45   | .45   | .31   | .31   | .17   | .17   | .08   | .08   | .046  | .046  |
| eHEALS Group 3<br>vs base               | beta                  | -0.37 | -0.34 | -0.38 | -0.35 | -0.37 | -0.33 | -0.44 | -0.42 | -0.46 | -0.42 | -0.44 | -0.4  |
|                                         | <i>P</i>              | .07   | .08   | .07   | .09   | .09   | .11   | .02   | .02   | .02   | .02   | .03   | .03   |
| eHEALS Group 4<br>vs base               | beta                  | -0.1  | -0.03 | -0.1  | -0.04 | -0.1  | -0.04 | -0.17 | -0.11 | -0.17 | -0.11 | -0.17 | -0.11 |
|                                         | <i>P</i>              | .66   | .89   | .65   | .88   | .65   | .88   | .40   | .64   | .40   | .64   | .40   | .64   |

Ordinary least squares regression (OLS) with robust standard errors, the constant and coefficients of the following variables were not displayed: Age group, Education, Gender, Income, Paid employment, Family status, Residence, Self-perceived health, Activity limitations, Chronic morbidity, Setting, HCP type, Regular HCP

<sup>a</sup> Negative Experiences Score: the count of PREM items that did not receive a “yes, definitely” (best experience) answer

<sup>b</sup> Likelihood ratio; omnibus test for independence, current model versus null model

<sup>c</sup> base: eHEALS Group 1



| <b>Any negative experience<sup>a</sup></b> | <b>Scenario</b>                  | <b>#1</b> | <b>#2</b> | <b>#3</b> | <b>#4</b> | <b>#5</b> | <b>#6</b> | <b>#7</b> | <b>#8</b> | <b>#9</b> | <b>#10</b> | <b>#11</b> | <b>#12</b> |
|--------------------------------------------|----------------------------------|-----------|-----------|-----------|-----------|-----------|-----------|-----------|-----------|-----------|------------|------------|------------|
| Sample                                     | N                                | 505       | 505       | 505       | 505       | 505       | 505       | 505       | 505       | 505       | 505        | 505        | 505        |
| LR test <sup>b</sup>                       | Chi <sup>2</sup> <sub>(28)</sub> | 51.0      | 50.9      | 48.9      | 48.9      | 48.9      | 48.8      | 50.1      | 50.1      | 49.6      | 49.6       | 50.0       | 49.9       |
|                                            | <i>P</i>                         | .005      | .005      | .009      | .009      | .009      | .009      | .006      | .006      | .007      | .007       | .007       | .007       |
| eHEALS Group 2<br>vs base <sup>c</sup>     | beta                             | 0.3       | 0.3       | 0.04      | 0.04      | -0.02     | -0.01     | -0.01     | -0.01     | -0.25     | -0.25      | -0.28      | -0.28      |
|                                            | <i>P</i>                         | .36       | .36       | .89       | .89       | .96       | .96       | .98       | .98       | .38       | .38        | .29        | .29        |
| eHEALS Group 3<br>vs base                  | beta                             | -0.12     | -0.1      | -0.03     | -0.03     | 0.04      | 0.02      | -0.26     | -0.24     | -0.16     | -0.17      | -0.09      | -0.11      |
|                                            | <i>P</i>                         | .67       | .70       | .93       | .92       | .89       | .94       | .30       | .31       | .54       | .51        | .75        | .67        |
| eHEALS Group 4<br>vs base                  | beta                             | -0.02     | -0.02     | -0.03     | -0.03     | -0.03     | -0.03     | -0.17     | -0.17     | -0.17     | -0.16      | -0.17      | -0.16      |
|                                            | <i>P</i>                         | .94       | .96       | .92       | .94       | .92       | .94       | .56       | .61       | .56       | .61        | .56        | .61        |

Logistic regression, the constant and coefficients of the following variables were not displayed: Age group, Education, Gender, Income, Paid employment, Family status, Residence, Self-perceived health, Activity limitations, Chronic morbidity, Setting, HCP type, Regular HCP

<sup>a</sup>Any negative experience: the response to a PREM-item was other than “yes, definitely” (best experience)

<sup>b</sup>Likelihood ratio; omnibus test for independence, current model versus null model

<sup>c</sup>base: eHEALS Group 1

| Travel <sup>a</sup>                 | Scenario                         | #1    | #2    | #3    | #4    | #5    | #6    | #7    | #8    | #9    | #10   | #11   | #12   |
|-------------------------------------|----------------------------------|-------|-------|-------|-------|-------|-------|-------|-------|-------|-------|-------|-------|
| Sample                              | N                                | 497   | 497   | 497   | 497   | 497   | 497   | 497   | 497   | 497   | 497   | 497   | 497   |
| LR test <sup>b</sup>                | Chi <sup>2</sup> <sub>(28)</sub> | 75.7  | 75.5  | 77.8  | 77.1  | 76.7  | 75.9  | 76.2  | 75.9  | 77.8  | 77.0  | 77.3  | 76.6  |
|                                     | <i>P</i>                         | <.001 | <.001 | <.001 | <.001 | <.001 | <.001 | <.001 | <.001 | <.001 | <.001 | <.001 | <.001 |
| eHEALS Group 2 vs base <sup>c</sup> | beta                             | 0.21  | 0.21  | 0.21  | 0.2   | 0.11  | 0.11  | -0.35 | -0.35 | -0.19 | -0.18 | -0.26 | -0.26 |
|                                     | <i>P</i>                         | .57   | .57   | .53   | .54   | .73   | .74   | .38   | .38   | .56   | .57   | .38   | .39   |
| eHEALS Group 3 vs base              | beta                             | -0.22 | -0.18 | -0.42 | -0.32 | -0.44 | -0.32 | -0.43 | -0.39 | -0.62 | -0.52 | -0.65 | -0.52 |
|                                     | <i>P</i>                         | .49   | .55   | .24   | .34   | .24   | .36   | .14   | .16   | .05   | .08   | .07   | .10   |
| eHEALS Group 4 vs base              | beta                             | -0.02 | -0.05 | -0.03 | -0.06 | -0.03 | -0.06 | -0.24 | -0.26 | -0.24 | -0.27 | -0.24 | -0.27 |
|                                     | <i>P</i>                         | .95   | .91   | .93   | .88   | .93   | .88   | .47   | .48   | .46   | .47   | .46   | .47   |

Logistic regression, the constant and coefficients of the following variables were not displayed: Age group, Education, Gender, Income, Paid employment, Family status, Residence, Self-perceived health, Activity limitations, Chronic morbidity, Setting, HCP type, Regular HCP

<sup>a</sup> Missed visit due to travel burden

<sup>b</sup> Likelihood ratio; omnibus test for independence, current model versus null model

<sup>c</sup> base: eHEALS Group 1

Check F dfs

| Visit <sup>a</sup>                     | Scenario                         | #1    | #2    | #3    | #4    | #5    | #6    | #7    | #8    | #9    | #10   | #11   | #12   |
|----------------------------------------|----------------------------------|-------|-------|-------|-------|-------|-------|-------|-------|-------|-------|-------|-------|
| Sample                                 | N                                | 498   | 498   | 498   | 498   | 498   | 498   | 498   | 498   | 498   | 498   | 498   | 498   |
| LR test <sup>b</sup>                   | Chi <sup>2</sup> <sub>(28)</sub> | 63.9  | 63.8  | 63.9  | 63.9  | 63.7  | 63.7  | 63.8  | 63.6  | 63.6  | 63.7  | 63.4  | 63.4  |
|                                        | <i>P</i>                         | <.001 | <.001 | <.001 | <.001 | <.001 | <.001 | <.001 | <.001 | <.001 | <.001 | <.001 | <.001 |
| eHEALS Group 2<br>vs base <sup>c</sup> | beta                             | -0.18 | -0.18 | -0.38 | -0.39 | -0.3  | -0.3  | -0.04 | -0.04 | -0.33 | -0.33 | -0.22 | -0.22 |
|                                        | <i>P</i>                         | .66   | .65   | .30   | .30   | .39   | .39   | .93   | .93   | .37   | .37   | .51   | .51   |
| eHEALS Group 3<br>vs base              | beta                             | -0.36 | -0.33 | -0.22 | -0.21 | -0.31 | -0.27 | -0.29 | -0.26 | -0.15 | -0.14 | -0.24 | -0.2  |
|                                        | <i>P</i>                         | .29   | .32   | .54   | .55   | .44   | .47   | .36   | .41   | .66   | .68   | .53   | .57   |
| eHEALS Group 4<br>vs base              | beta                             | -0.24 | -0.29 | -0.25 | -0.29 | -0.25 | -0.29 | -0.16 | -0.21 | -0.17 | -0.21 | -0.17 | -0.21 |
|                                        | <i>P</i>                         | .54   | .51   | .53   | .51   | .53   | .51   | .66   | .61   | .65   | .61   | .65   | .61   |

Logistic regression, the constant and coefficients of the following variables were not displayed: Age group, Education, Gender, Income, Paid employment, Family status, Residence, Self-perceived health, Activity limitations, Chronic morbidity, Setting, HCP type, Regular HCP

<sup>a</sup> Missed visit due to cost burden

<sup>b</sup> Likelihood ratio; omnibus test for independence, current model versus null model

<sup>c</sup> base: eHEALS Group 1

| <b>Intervention<sup>a</sup></b>        | <b>Scenario</b>                  | <b>#1</b> | <b>#2</b> | <b>#3</b> | <b>#4</b> | <b>#5</b> | <b>#6</b> | <b>#7</b> | <b>#8</b> | <b>#9</b> | <b>#10</b> | <b>#11</b> | <b>#12</b> |
|----------------------------------------|----------------------------------|-----------|-----------|-----------|-----------|-----------|-----------|-----------|-----------|-----------|------------|------------|------------|
| Sample                                 | N                                | 501       | 501       | 501       | 501       | 501       | 501       | 501       | 501       | 501       | 501        | 501        | 501        |
| LR test <sup>b</sup>                   | Chi <sup>2</sup> <sub>(28)</sub> | 47.6      | 46.6      | 46.7      | 45.8      | 47.9      | 46.3      | 47.3      | 46.3      | 46.5      | 45.5       | 47.6       | 46.1       |
|                                        | P                                | .01       | .02       | .01       | .02       | .01       | .02       | .01       | .02       | .02       | .02        | .01        | .02        |
| eHEALS Group 2<br>vs base <sup>c</sup> | beta                             | -0.28     | -0.29     | -0.46     | -0.46     | -0.42     | -0.43     | -0.19     | -0.19     | -0.42     | -0.42      | -0.38      | -0.38      |
|                                        | P                                | .49       | .48       | .23       | .22       | .24       | .23       | .67       | .67       | .27       | .27        | .29        | .29        |
| eHEALS Group 3<br>vs base              | beta                             | -0.82     | -0.71     | -0.82     | -0.68     | -1.03     | -0.79     | -0.75     | -0.64     | -0.75     | -0.61      | -0.97      | -0.71      |
|                                        | P                                | .03       | .04       | .04       | .07       | .02       | .049      | .03       | .05       | .05       | .08        | .03        | .06        |
| eHEALS Group 4<br>vs base              | beta                             | -0.14     | -0.1      | -0.15     | -0.11     | -0.15     | -0.11     | -0.06     | -0.02     | -0.07     | -0.02      | -0.07      | -0.03      |
|                                        | P                                | .72       | .82       | .70       | .80       | .70       | .8        | .86       | .97       | .85       | .96        | .84        | .95        |

Logistic regression, the constant and coefficients of the following variables were not displayed: Age group, Education, Gender, Income, Paid employment, Family status, Residence, Self-perceived health, Activity limitations, Chronic morbidity, Setting, HCP type, Regular HCP

<sup>a</sup> Missed intervention due to cost burden

<sup>b</sup> Likelihood ratio; omnibus test for independence, current model versus null model

<sup>c</sup> base: eHEALS Group 1

| Medication <sup>a</sup>                | Scenario                         | #1    | #2    | #3    | #4    | #5    | #6    | #7    | #8    | #9    | #10   | #11   | #12   |
|----------------------------------------|----------------------------------|-------|-------|-------|-------|-------|-------|-------|-------|-------|-------|-------|-------|
| Sample                                 | N                                | 499   | 499   | 499   | 499   | 499   | 499   | 499   | 499   | 499   | 499   | 499   | 499   |
| LR test <sup>b</sup>                   | Chi <sup>2</sup> <sub>(28)</sub> | 92.7  | 92.5  | 93.5  | 94.2  | 93.1  | 93.8  | 92.7  | 92.5  | 93.5  | 94.1  | 93.1  | 93.7  |
|                                        | <i>P</i>                         | <.001 | <.001 | <.001 | <.001 | <.001 | <.001 | <.001 | <.001 | <.001 | <.001 | <.001 | <.001 |
| eHEALS Group 2<br>vs base <sup>c</sup> | beta                             | 0.05  | 0.07  | 0.13  | 0.14  | 0.07  | 0.08  | 0.00  | 0.00  | 0.11  | 0.11  | 0.03  | 0.03  |
|                                        | <i>P</i>                         | .89   | .85   | .70   | .68   | .83   | .81   | .99   | .99   | .74   | .74   | .91   | .91   |
| eHEALS Group 3<br>vs base              | beta                             | -0.04 | -0.16 | -0.17 | -0.31 | -0.15 | -0.34 | -0.06 | -0.19 | -0.19 | -0.35 | -0.18 | -0.37 |
|                                        | <i>P</i>                         | .91   | .61   | .64   | .36   | .69   | .34   | .83   | .51   | .56   | .27   | .62   | .27   |
| eHEALS Group 4<br>vs base              | beta                             | -0.28 | 0.03  | -0.28 | 0.02  | -0.28 | 0.01  | -0.3  | 0.00  | -0.31 | -0.01 | -0.31 | -0.02 |
|                                        | <i>P</i>                         | .47   | .94   | .47   | .96   | .46   | .97   | .39   | .99   | .38   | .97   | .38   | .96   |

Logistic regression, the constant and coefficients of the following variables were not displayed: Age group, Education, Gender, Income, Paid employment, Family status, Residence, Self-perceived health, Activity limitations, Chronic morbidity, Setting, HCP type, Regular HCP

<sup>a</sup> Missed medication due to cost burden

<sup>b</sup> Likelihood ratio; omnibus test for independence, current model versus null model

<sup>c</sup> base: eHEALS Group 1

| <b>oWP<sup>a</sup></b>                 | <b>Scenario</b>                  | <b>#1</b> | <b>#2</b> | <b>#3</b> | <b>#4</b> | <b>#5</b> | <b>#6</b> | <b>#7</b> | <b>#8</b> | <b>#9</b> | <b>#10</b> | <b>#11</b> | <b>#12</b> |
|----------------------------------------|----------------------------------|-----------|-----------|-----------|-----------|-----------|-----------|-----------|-----------|-----------|------------|------------|------------|
| Sample                                 | N                                | 505       | 505       | 505       | 505       | 505       | 505       | 505       | 505       | 505       | 505        | 505        | 505        |
| LR test <sup>b</sup>                   | Chi <sup>2</sup> <sub>(28)</sub> | 53.9      | 54.0      | 51.7      | 51.8      | 51.9      | 52.0      | 53.6      | 53.7      | 52.2      | 52.3       | 52.4       | 52.5       |
|                                        | <i>P</i>                         | .002      | .002      | .004      | .004      | .004      | .004      | .002      | .002      | .004      | .004       | .003       | .003       |
| eHEALS Group 2<br>vs base <sup>c</sup> | beta                             | -0.22     | -0.22     | 0.05      | 0.05      | 0.06      | 0.06      | -0.07     | -0.07     | 0.24      | 0.24       | 0.23       | 0.23       |
|                                        | <i>P</i>                         | .57       | .57       | .87       | .87       | .85       | .85       | .87       | .87       | .45       | .46        | .46        | .46        |
| eHEALS Group 3<br>vs base              | beta                             | 0.32      | 0.31      | 0.26      | 0.27      | 0.31      | 0.31      | 0.4       | 0.39      | 0.34      | 0.35       | 0.39       | 0.39       |
|                                        | <i>P</i>                         | .31       | .30       | .43       | .40       | .37       | .35       | .16       | .15       | .27       | .23        | .23        | .20        |
| eHEALS Group 4<br>vs base              | beta                             | 0.37      | 0.41      | 0.38      | 0.43      | 0.38      | 0.43      | 0.46      | 0.5       | 0.46      | 0.5        | 0.46       | 0.5        |
|                                        | <i>P</i>                         | .29       | .28       | .27       | .26       | .27       | .26       | .15       | .16       | .15       | .16        | .15        | .16        |

Logistic regression, the constant and coefficients of the following variables were not displayed: Age group, Education, Gender, Income, Paid employment, Family status, Residence, Self-perceived health, Activity limitations, Chronic morbidity, Setting, HCP type, Regular HCP

<sup>a</sup> Office waiting time was a problem

<sup>b</sup> Likelihood ratio; omnibus test for independence, current model versus null model

<sup>c</sup> base: eHEALS Group 1

| <b>aWP<sup>a</sup></b>                 | <b>Scenario</b>                  | <b>#1</b> | <b>#2</b> | <b>#3</b> | <b>#4</b> | <b>#5</b> | <b>#6</b> | <b>#7</b> | <b>#8</b> | <b>#9</b> | <b>#10</b> | <b>#11</b> | <b>#12</b> |
|----------------------------------------|----------------------------------|-----------|-----------|-----------|-----------|-----------|-----------|-----------|-----------|-----------|------------|------------|------------|
| Sample                                 | N                                | 502       | 502       | 502       | 502       | 502       | 502       | 502       | 502       | 502       | 502        | 502        | 502        |
| LR test <sup>b</sup>                   | Chi <sup>2</sup> <sub>(27)</sub> | 63.7      | 65.1      | 63.6      | 64.7      | 63.5      | 64.8      | 63.8      | 65.1      | 63.8      | 66.0       | 63.7       | 65.0       |
|                                        | <i>P</i>                         | <.001     | <.001     | <.001     | <.001     | <.001     | <.001     | <.001     | <.001     | <.001     | <.001      | <.001      | <.001      |
| eHEALS Group 2<br>vs base <sup>c</sup> | beta                             | -0.3      | -0.29     | -0.44     | -0.44     | -0.42     | -0.41     | -0.33     | -0.33     | -0.48     | -0.48      | -0.43      | -0.43      |
|                                        | <i>P</i>                         | .48       | .49       | .25       | .26       | .26       | .27       | .47       | .47       | .22       | .21        | .23        | .23        |
| eHEALS Group 3<br>vs base              | beta                             | -0.47     | -0.55     | -0.38     | -0.51     | -0.4      | -0.56     | -0.43     | -0.52     | -0.34     | -0.47      | -0.37      | -0.53      |
|                                        | <i>P</i>                         | .20       | .12       | .33       | .18       | .34       | .16       | .21       | .12       | .35       | .18        | .36        | .16        |
| eHEALS Group 4<br>vs base              | beta                             | -0.37     | -0.06     | -0.37     | -0.06     | -0.37     | -0.06     | -0.33     | -0.02     | -0.32     | -0.02      | -0.33      | -0.02      |
|                                        | <i>P</i>                         | .38       | .90       | .38       | .89       | .38       | .89       | .41       | .97       | .41       | .97        | .41        | .96        |

Logistic regression, the constant and coefficients of the following variables were not displayed: Age group, Education, Gender, Income, Paid employment, Family status, Residence, Self-perceived health, Activity limitations, Chronic morbidity, Setting, HCP type, Regular HCP

<sup>a</sup> Appointment waiting time was a problem

<sup>b</sup> Likelihood ratio; omnibus test for independence, current model versus null model

<sup>c</sup> base: eHEALS Group 1

| <b>Log oWT<sup>a</sup></b>             | <b>Scenario</b>       | <b>#1</b> | <b>#2</b> | <b>#3</b> | <b>#4</b> | <b>#5</b> | <b>#6</b> | <b>#7</b> | <b>#8</b> | <b>#9</b> | <b>#10</b> | <b>#11</b> | <b>#12</b> |
|----------------------------------------|-----------------------|-----------|-----------|-----------|-----------|-----------|-----------|-----------|-----------|-----------|------------|------------|------------|
| Sample                                 | N                     | 502       | 502       | 502       | 502       | 502       | 502       | 502       | 502       | 502       | 502        | 502        | 502        |
| LR test <sup>b</sup>                   | F <sub>(28,473)</sub> | 2.50      | 2.51      | 2.48      | 2.50      | 2.48      | 2.50      | 2.49      | 2.51      | 2.49      | 2.51       | 2.49       | 2.51       |
|                                        | <i>P</i>              | <.001     | <.001     | <.001     | <.001     | <.001     | <.001     | <.001     | <.001     | <.001     | <.001      | <.001      | <.001      |
| eHEALS Group 2<br>vs base <sup>c</sup> | beta                  | -0.08     | -0.08     | -0.02     | -0.02     | -0.01     | -0.01     | 0.04      | 0.04      | 0.09      | 0.09       | 0.08       | 0.08       |
|                                        | <i>P</i>              | .63       | .64       | .91       | .91       | .92       | .93       | .80       | .80       | .54       | .54        | .55        | .55        |
| eHEALS Group 3<br>vs base              | beta                  | 0.02      | 0.01      | -0.01     | -0.01     | -0.01     | -0.02     | 0.06      | 0.06      | 0.04      | 0.04       | 0.03       | 0.03       |
|                                        | <i>P</i>              | .91       | .94       | .94       | .93       | .93       | .92       | .60       | .62       | .78       | .78        | .81        | .80        |
| eHEALS Group 4<br>vs base              | beta                  | 0.07      | 0.13      | 0.08      | 0.13      | 0.08      | 0.13      | 0.13      | 0.18      | 0.13      | 0.18       | 0.13       | 0.18       |
|                                        | <i>P</i>              | .63       | .46       | .62       | .45       | .62       | .45       | .38       | .27       | .38       | .27        | .38        | .27        |

Ordinary least squares (OLS) regression, the constant and coefficients of the following variables were not displayed: Age group, Education, Gender, Income, Paid employment, Family status, Residence, Self-perceived health, Activity limitations, Chronic morbidity, Setting, HCP type, Regular HCP

<sup>a</sup> Log-office waiting time

<sup>b</sup> Likelihood ratio; omnibus test for independence, current model versus null model

<sup>c</sup> base: eHEALS Group 1



| <b>Log aWT<sup>a</sup></b>             | <b>Scenario</b>       | <b>#1</b> | <b>#2</b> | <b>#3</b> | <b>#4</b> | <b>#5</b> | <b>#6</b> | <b>#7</b> | <b>#8</b> | <b>#9</b> | <b>#10</b> | <b>#11</b> | <b>#12</b> |
|----------------------------------------|-----------------------|-----------|-----------|-----------|-----------|-----------|-----------|-----------|-----------|-----------|------------|------------|------------|
| Sample                                 | N                     | 492       | 492       | 492       | 492       | 492       | 492       | 492       | 492       | 492       | 492        | 492        | 492        |
| LR test <sup>b</sup>                   | F <sub>(28,455)</sub> | 8.99      | 9.02      | 8.92      | 8.95      | 8.93      | 8.94      | 9.02      | 9.05      | 8.92      | 8.95       | 8.93       | 8.94       |
|                                        | P                     | <.001     | <.001     | <.001     | <.001     | <.001     | <.001     | <.001     | <.001     | <.001     | <.001      | <.001      | <.001      |
| eHEALS Group 2<br>vs base <sup>c</sup> | beta                  | 0.15      | 0.16      | 0.02      | 0.02      | -0.04     | -0.03     | 0.24      | 0.24      | 0.03      | 0.03       | -0.04      | -0.04      |
|                                        | P                     | .51       | .50       | .92       | .91       | .86       | .87       | .34       | .34       | .89       | .89        | .82        | .82        |
| eHEALS Group 3<br>vs base              | beta                  | -0.08     | -0.09     | -0.03     | -0.05     | 0.05      | 0.00      | -0.08     | -0.09     | -0.03     | -0.05      | 0.05       | 0.00       |
|                                        | P                     | .69       | .65       | .88       | .79       | .83       | .99       | .66       | .61       | .87       | .77        | .81        | .99        |
| eHEALS Group 4<br>vs base              | beta                  | 0.03      | 0.12      | 0.03      | 0.11      | 0.03      | 0.11      | 0.02      | 0.11      | 0.02      | 0.11       | 0.03       | 0.11       |
|                                        | P                     | .90       | .64       | .91       | .65       | .91       | .65       | .91       | .63       | .91       | .64        | .90        | .63        |

Ordinary least squares (OLS) regression, the constant and coefficients of the following variables were not displayed: Age group, Education, Gender, Income, Paid employment, Family status, Residence, Self-perceived health, Activity limitations, Chronic morbidity, Setting, HCP type, Regular HCP

<sup>a</sup> Log-appointment waiting time

<sup>b</sup> Likelihood ratio; omnibus test for independence, current model versus null model

<sup>c</sup> base: eHEALS Group 1

| Square-root Unmet Medical Needs <sup>a</sup> | Scenario              | #1    | #2    | #3    | #4    | #5    | #6    | #7    | #8    | #9    | #10   | #11   | #12   |
|----------------------------------------------|-----------------------|-------|-------|-------|-------|-------|-------|-------|-------|-------|-------|-------|-------|
| Sample                                       | N                     | 484   | 484   | 484   | 484   | 484   | 484   | 484   | 484   | 484   | 484   | 484   | 484   |
| LR test <sup>b</sup>                         | F <sub>(28,455)</sub> | 7.03  | 7.00  | 7.16  | 7.11  | 7.41  | 7.29  | 7.03  | 7.00  | 7.15  | 7.11  | 7.42  | 7.3   |
|                                              | <i>P</i>              | <.001 | <.001 | <.001 | <.001 | <.001 | <.001 | <.001 | <.001 | <.001 | <.001 | <.001 | <.001 |
| eHEALS Group 2<br>vs base <sup>c</sup>       | beta                  | -0.06 | -0.06 | -0.05 | -0.05 | -0.06 | -0.06 | -0.07 | -0.07 | -0.05 | -0.05 | -0.06 | -0.06 |
|                                              | <i>P</i>              | .51   | .51   | .57   | .57   | .48   | .48   | .49   | .49   | .58   | .58   | .47   | .47   |
| eHEALS Group 3<br>vs base                    | beta                  | -0.12 | -0.12 | -0.16 | -0.15 | -0.17 | -0.16 | -0.11 | -0.11 | -0.15 | -0.14 | -0.16 | -0.15 |
|                                              | <i>P</i>              | .14   | .13   | .07   | .07   | .05   | .06   | .13   | .12   | .06   | .06   | .04   | .049  |
| eHEALS Group 4<br>vs base                    | beta                  | -0.09 | -0.06 | -0.09 | -0.06 | -0.09 | -0.06 | -0.08 | -0.05 | -0.08 | -0.05 | -0.08 | -0.05 |
|                                              | <i>P</i>              | .36   | .56   | .36   | .55   | .36   | .55   | .38   | .59   | .38   | .58   | .37   | .58   |

Ordinary least squares (OLS) regression with robust standard errors, the constant and coefficients of the following variables were not displayed: Age group, Education, Gender, Income, Paid employment, Family status, Residence, Self-perceived health, Activity limitations, Chronic morbidity, Setting, HCP type, Regular HCP

<sup>a</sup> Unmet Medical Needs Score: the number of aspects that contributed to the experience of an unmet need (missed visit due to travel burden; missed visit due to cost burden; missed intervention due to cost burden and; missed medication due to cost burden)

<sup>b</sup> Likelihood ratio; omnibus test for independence, current model versus null model

<sup>c</sup> base: eHEALS Group 1

| Any unmet need <sup>a</sup>         | Scenario                         | #1    | #2    | #3    | #4    | #5    | #6    | #7    | #8    | #9    | #10   | #11   | #12   |
|-------------------------------------|----------------------------------|-------|-------|-------|-------|-------|-------|-------|-------|-------|-------|-------|-------|
| Sample                              | N                                | 481   | 481   | 481   | 481   | 481   | 481   | 481   | 481   | 481   | 481   | 481   | 481   |
| LR test <sup>b</sup>                | Chi <sup>2</sup> <sub>(27)</sub> | 111.1 | 111.1 | 114.0 | 114.3 | 114.1 | 114.3 | 111.6 | 111.6 | 114.1 | 114.3 | 114.3 | 114.5 |
|                                     | <i>P</i>                         | <.001 | <.001 | <.001 | <.001 | <.001 | <.001 | <.001 | <.001 | <.001 | <.001 | <.001 | <.001 |
| eHEALS Group 2 vs base <sup>c</sup> | beta                             | -0.11 | -0.11 | -0.01 | -0.01 | -0.06 | -0.05 | -0.28 | -0.27 | -0.08 | -0.08 | -0.13 | -0.13 |
|                                     | <i>P</i>                         | .75   | .75   | .98   | .99   | .85   | .85   | .46   | .46   | .79   | .79   | .64   | .64   |
| eHEALS Group 3 vs base              | beta                             | -0.33 | -0.36 | -0.54 | -0.53 | -0.62 | -0.6  | -0.36 | -0.39 | -0.57 | -0.57 | -0.65 | -0.63 |
|                                     | <i>P</i>                         | .26   | .21   | .09   | .08   | .07   | .06   | .18   | .13   | .05   | .04   | .04   | .03   |
| eHEALS Group 4 vs base              | beta                             | -0.38 | -0.3  | -0.38 | -0.3  | -0.38 | -0.3  | -0.41 | -0.33 | -0.41 | -0.34 | -0.42 | -0.34 |
|                                     | <i>P</i>                         | .26   | .44   | .26   | .43   | .26   | .42   | .19   | .35   | .19   | .35   | .19   | .34   |

Logistic regression, the constant and coefficients of the following variables were not displayed: Age group, Education, Gender, Income, Paid employment, Family status, Residence, Self-perceived health, Activity limitations, Chronic morbidity, Setting, HCP type, Regular HCP

<sup>a</sup> Any Unmet Medical Need: any unmet need experienced (missed visit due to travel burden; missed visit due to cost burden; missed intervention due to cost burden and; missed medication due to cost burden)

<sup>b</sup> Likelihood ratio; omnibus test for independence, current model versus null model

<sup>c</sup> base: eHEALS Group 1

| Any WP <sup>a</sup>                 | Scenario                         | #1    | #2    | #3    | #4    | #5    | #6    | #7    | #8    | #9    | #10   | #11   | #12   |
|-------------------------------------|----------------------------------|-------|-------|-------|-------|-------|-------|-------|-------|-------|-------|-------|-------|
| Sample                              | N                                | 505   | 505   | 505   | 505   | 505   | 505   | 505   | 505   | 505   | 505   | 505   | 505   |
| LR test <sup>b</sup>                | Chi <sup>2</sup> <sub>(28)</sub> | 75.1  | 75.0  | 74.8  | 74.7  | 74.4  | 74.3  | 75.1  | 75.0  | 74.8  | 74.7  | 74.4  | 74.3  |
|                                     | <i>P</i>                         | <.001 | <.001 | <.001 | <.001 | <.001 | <.001 | <.001 | <.001 | <.001 | <.001 | <.001 | <.001 |
| eHEALS Group 2 vs base <sup>c</sup> | beta                             | -0.16 | -0.16 | -0.06 | -0.06 | 0.00  | 0.00  | -0.16 | -0.16 | -0.02 | -0.02 | 0.05  | 0.05  |
|                                     | <i>P</i>                         | .65   | .65   | .84   | .85   | .99   | .99   | .67   | .67   | .94   | .94   | .87   | .87   |
| eHEALS Group 3 vs base              | beta                             | 0.17  | 0.15  | 0.21  | 0.17  | 0.19  | 0.15  | 0.20  | 0.18  | 0.23  | 0.20  | 0.22  | 0.18  |
|                                     | <i>P</i>                         | .56   | .60   | .50   | .56   | .56   | .62   | .46   | .49   | .42   | .47   | .48   | .53   |
| eHEALS Group 4 vs base              | beta                             | 0.04  | 0.04  | 0.05  | 0.05  | 0.05  | 0.05  | 0.07  | 0.08  | 0.07  | 0.08  | 0.07  | 0.08  |
|                                     | <i>P</i>                         | .91   | .90   | .89   | .88   | .89   | .88   | .82   | .83   | .81   | .81   | .81   | .82   |

Logistic regression, the constant and coefficients of the following variables were not displayed: Age group, Education, Gender, Income, Paid employment, Family status, Residence, Self-perceived health, Activity limitations, Chronic morbidity, Setting, HCP type, Regular HCP

<sup>a</sup> Any Waiting Problem: the office waiting time or appointment waiting time was a problem

<sup>b</sup> Likelihood ratio; omnibus test for independence, current model versus null model

<sup>c</sup> base: eHEALS Group 1
