# Supplementary material for: Exploring eHealth Literacy and Patient-Reported Experiences With Outpatient Care in the Hungarian General Adult Population: Cross-Sectional Study
Source: PubMed Central journal article supplement (PMC7448194; doi:10.2196/19013), 2020-08-11
Supplement: jmir_v22i8e19013_app7.pdf [file jmir_v22i8e19013_app7.pdf]

Zrubka Z, Brito Fernandes O, Baji P, Hajdu O, Kovács L, Kringos D; Klazinga N, Gulácsi L, Brodszky V, Rencz F, Péntek M. eHealth Literacy and Patient-Reported Experiences with Outpatient Care in the Hungarian General Adult Population: A Cross-Sectional Survey Study. *J Med Internet Res.* 2020

## Multimedia Appendix 7

Regression analyses of unmet medical needs for those respondents, who had health problem over the past 12 months

| Model                                    | Travel <sup>a</sup> |          | Visit <sup>b</sup> |          | Intervention <sup>c</sup> |          | Medication <sup>d</sup> |          | Square root Unmet Medical Needs Score <sup>e</sup> |          | Any Unmet Medical Needs <sup>f</sup> |          |
|------------------------------------------|---------------------|----------|--------------------|----------|---------------------------|----------|-------------------------|----------|----------------------------------------------------|----------|--------------------------------------|----------|
|                                          | Logistic Beta       | <i>P</i> | Logistic Beta      | <i>P</i> | Logistic Beta             | <i>P</i> | Logistic Beta           | <i>P</i> | Robust <sup>p</sup> Beta                           | <i>P</i> | Logistic Beta                        | <i>P</i> |
| <b>eHEALS<sup>g</sup></b>                |                     |          |                    |          |                           |          |                         |          |                                                    |          |                                      |          |
| 2nd quartile                             | -0.08               | .78      | -0.33              | .29      | -0.34                     | .32      | 0.03                    | .91      | -0.03                                              | .68      | -0.03                                | .92      |
| 3rd quartile                             | -0.22               | .42      | -0.19              | .51      | -0.35                     | .28      | -0.04                   | .88      | -0.08                                              | .27      | -0.36                                | .16      |
| 4th quartile                             | -0.06               | .84      | -0.10              | .74      | 0.14                      | .66      | -0.15                   | .63      | -0.04                                              | .65      | -0.31                                | .26      |
| <b>Age group<sup>h</sup></b>             |                     |          |                    |          |                           |          |                         |          |                                                    |          |                                      |          |
| 25-44 years old                          | -0.24               | .48      | -0.09              | .82      | 0.73                      | .14      | -0.33                   | .38      | -0.17                                              | .1       | -0.87                                | .02      |
| 45-64 years old                          | -0.74               | .048     | -0.95              | .02      | -0.08                     | .88      | -0.59                   | .15      | -0.37                                              | <.001    | -1.54                                | <.001    |
| 65+ years old                            | -1.23               | .004     | -1.23              | .008     | 0.09                      | .87      | -0.91                   | .045     | -0.43                                              | <.001    | -1.59                                | <.001    |
| <b>Education<sup>i</sup></b>             |                     |          |                    |          |                           |          |                         |          |                                                    |          |                                      |          |
| Secondary                                | 0.05                | .82      | -0.07              | .78      | -0.09                     | .77      | 0.25                    | .33      | 0.01                                               | .89      | 0.03                                 | .89      |
| Tertiary                                 | -0.66               | .03      | -0.58              | .07      | -0.39                     | .25      | -1.03                   | .002     | -0.21                                              | .005     | -0.76                                | .005     |
| <b>Gender</b>                            |                     |          |                    |          |                           |          |                         |          |                                                    |          |                                      |          |
| Male                                     | -0.32               | .13      | -0.32              | .16      | -0.04                     | .87      | -0.43                   | .06      | -0.11                                              | .07      | -0.35                                | .08      |
| <b>Income<sup>j</sup></b>                |                     |          |                    |          |                           |          |                         |          |                                                    |          |                                      |          |
| 2nd quintile                             | -0.04               | .88      | -0.02              | .94      | 0.34                      | .32      | 0.24                    | .42      | 0.01                                               | .89      | -0.13                                | .65      |
| 3rd quintile                             | -0.64               | .11      | -0.45              | .29      | -0.28                     | .55      | 0.13                    | .74      | -0.13                                              | .2       | -0.52                                | .15      |
| 4th quintile                             | -0.18               | .58      | -0.10              | .79      | -0.19                     | .64      | -0.03                   | .93      | -0.07                                              | .48      | -0.33                                | .3       |
| 5th quintile                             | -0.35               | .25      | -0.38              | .26      | -0.34                     | .36      | -0.58                   | .09      | -0.19                                              | .02      | -0.76                                | .008     |
| <b>Paid employment</b>                   |                     |          |                    |          |                           |          |                         |          |                                                    |          |                                      |          |
| Yes                                      | -0.02               | .93      | 0.15               | .57      | 0.10                      | .73      | -0.02                   | .94      | -0.03                                              | .7       | -0.25                                | .29      |
| <b>Family status</b>                     |                     |          |                    |          |                           |          |                         |          |                                                    |          |                                      |          |
| Married / domestic partnership           | 0.33                | .1       | 0.09               | .7       | 0.37                      | .13      | -                       | 1.       | 0.05                                               | .39      | 0.14                                 | .47      |
| <b>Residence<sup>k</sup></b>             |                     |          |                    |          |                           |          |                         |          |                                                    |          |                                      |          |
| City                                     | -0.34               | .19      | -0.50              | .06      | 0.46                      | .17      | -0.20                   | .49      | -0.10                                              | .12      | -0.49                                | .04      |
| Village                                  | -0.34               | .27      | -0.42              | .2       | 0.09                      | .83      | -0.30                   | .38      | -0.10                                              | .25      | -0.33                                | .26      |
| <b>Self-perceived health<sup>l</sup></b> |                     |          |                    |          |                           |          |                         |          |                                                    |          |                                      |          |
| Very bad                                 | 1.80                | .16      | 0.28               | .81      | 1.65                      | .17      | 0.91                    | .49      | 0.71                                               | .002     | -                                    | -        |
| Bad                                      | 1.50                | .005     | 0.37               | .5       | 1.17                      | .07      | 0.03                    | .95      | 0.41                                               | .009     | 1.62                                 | .002     |
| Fair                                     | 0.65                | .14      | -0.10              | .82      | 0.67                      | .21      | 0.25                    | .59      | 0.19                                               | .11      | 0.88                                 | .03      |
| Good                                     | 0.29                | .48      | -0.18              | .65      | 0.09                      | .86      | -0.58                   | .18      | 0.05                                               | .61      | 0.43                                 | .24      |
| <b>GALI<sup>m</sup></b>                  |                     |          |                    |          |                           |          |                         |          |                                                    |          |                                      |          |
| Limited but not severely                 | 0.41                | .08      | 0.47               | .06      | 0.23                      | .41      | 0.90                    | <.001    | 0.16                                               | .01      | 0.46                                 | .04      |
| Severely limited                         | 0.79                | .06      | 0.75               | .09      | 0.50                      | .27      | 1.60                    | <.001    | 0.33                                               | .03      | 0.86                                 | .046     |
| <b>Chronic morbidity</b>                 |                     |          |                    |          |                           |          |                         |          |                                                    |          |                                      |          |
| Yes                                      | 0.19                | .44      | 0.67               | .02      | 0.37                      | .25      | 0.42                    | .15      | 0.19                                               | .008     | 0.56                                 | .02      |
| <b>Constant</b>                          | -0.66               | .28      | -0.58              | .36      | -3.01                     | <.001    | -0.84                   | .19      | 0.81                                               | <.001    | 0.83                                 | .15      |
| n                                        | 626                 |          | 626                |          | 627                       |          | 631                     |          | 605                                                |          | 601                                  |          |
| LR test Chi-square (24)                  | 81.1                | <.001    | 59.0               | <.001    | 47.6                      | .09      | 107.3                   | <.001    |                                                    |          |                                      |          |
| LR test F(24,580)                        |                     |          |                    |          |                           |          |                         |          | 8.47                                               | <.001    |                                      |          |
| LR test Chi-square (23)                  |                     |          |                    |          |                           |          |                         |          |                                                    |          | 124.7                                | <.001    |
| R <sup>2</sup>                           |                     |          |                    |          |                           |          |                         |          | 0.20                                               |          |                                      |          |
| Ramsey RESET test F(3;577)               |                     |          |                    |          |                           |          |                         |          | 2.40                                               | .07      |                                      |          |
| GOF <sup>o</sup> test Chi-square (580)   | 589.7               | .38      |                    |          | 610.0                     | .19      |                         |          |                                                    |          |                                      |          |
| GOF <sup>o</sup> test Chi-square (579)   |                     |          | 604.9              | .22      |                           |          |                         |          |                                                    |          |                                      |          |
| GOF <sup>o</sup> test Chi-square (586)   |                     |          |                    |          |                           |          | 593.6                   | .40      |                                                    |          |                                      |          |
| GOF test Chi-square (558)                |                     |          |                    |          |                           |          |                         |          |                                                    |          | 579.1                                | .26      |

<sup>a</sup>Office waiting time was a problem

<sup>b</sup>Appointment waiting time was a problem

<sup>c</sup>Log-office waiting time

<sup>d</sup>Log- appointment waiting time

<sup>e</sup>Unmet Medical Needs Score: the number of aspects that contributed to the experience of an unmet need (missed visit due to travel burden; missed visit due to cost burden; missed intervention due to cost burden and; missed medication due to cost burden)

<sup>f</sup>Any Unmet Medical Need: any unmet need experienced (missed visit due to travel burden; missed visit due to cost burden; missed intervention due to cost burden)

<sup>g</sup>Base: 1st quartile

<sup>h</sup>Base: 18-24 years old

<sup>i</sup>Base: Primary

<sup>j</sup>Base: 1st quintile

<sup>k</sup>Base: Capital

<sup>l</sup>Base: Very goodr

<sup>m</sup>Base: Not limited

<sup>n</sup>Likelihood ratio; omnibus test for independence, current model versus null model

<sup>o</sup>Goodness of fit, Hosmer-Lemeshow test

<sup>p</sup>Ordinary least squares regression with robust standard errors
